# Supplementary material
Source: PubMed Central journal article supplement (PMC3915880)
Supplement: NIHMS548386-supplement-2_si_001.pdf [file NIHMS548386-supplement-2_si_001.pdf]

# Supporting Information for

## Studies of Iron(III) Porphyrinates Containing Silanethiolate Ligands

Daniel J. Meininger, Jonathan D. Caranto, Hadi D. Arman, and Zachary J. Tonzetich\*

Department of Chemistry, University of Texas at San Antonio, San Antonio, TX 78249

zachary.tonzetich@utsa.edu

---

| Contents                                                                                                             | Pages |
|----------------------------------------------------------------------------------------------------------------------|-------|
| <b>Figure S1.</b> Electronic absorption spectrum of [Fe(STIPS)(TPP)] in dichloromethane.                             | S2    |
| <b>Figure S2.</b> Electronic absorption spectrum of [Fe(STIPS)(TMP)] in dichloromethane.                             | S2    |
| <b>Figure S3.</b> Electronic absorption spectrum of [Fe(SSiPh <sub>3</sub> )(TMP)] in dichloromethane.               | S3    |
| <b>Figure S4.</b> Electronic absorption spectrum of [Fe(SPh)(TMP)] in dichloromethane.                               | S3    |
| <b>Figure S5.</b> <sup>1</sup> H NMR spectrum of the reaction of [Fe(OCH <sub>3</sub> )(TPP)] and <sup>t</sup> BuSH. | S4    |
| <b>Figure S6.</b> NMR spectra for iron(III) porphyrinates.                                                           | S4    |
| <b>Figure S7.</b> Thermal ellipsoid drawing of [Fe(SPh)(TMP)].                                                       | S5    |
| <b>Figure S8.</b> CV of [FeCl(TMP)] in CH <sub>2</sub> Cl <sub>2</sub> .                                             | S5    |
| <b>Figure S9.</b> Additional CVs of [Fe(STIPS)(TPP)] in CH <sub>2</sub> Cl <sub>2</sub> .                            | S6    |
| <b>Figure S10.</b> CV of [Fe(STIPS)(TMP)] in CH <sub>2</sub> Cl <sub>2</sub> .                                       | S6    |
| <b>Figure S11.</b> CV of [Fe(SSiPh <sub>3</sub> )(TMP)] in CH <sub>2</sub> Cl <sub>2</sub> .                         | S7    |
| <b>Figure S12.</b> CV of [Fe(SPh)(TMP)] in CH <sub>2</sub> Cl <sub>2</sub> .                                         | S7    |
| <b>Figure S13.</b> CV of (Et <sub>3</sub> NH)(STIPS) in CH <sub>2</sub> Cl <sub>2</sub> .                            | S8    |
| <b>Figure S14.</b> EPR spectrum of [Fe(STIPS)(TMP)] in 2-MeTHF at 77 K.                                              | S8    |
| <b>Figure S15.</b> EPR spectrum of [Fe(SSiPh <sub>3</sub> )(TMP)] in 2-MeTHF at 77 K.                                | S9    |
| <b>Figure S16.</b> EPR spectrum of [Fe(SPh)(TMP)] in 2-MeTHF between 4 and 62 K.                                     | S9    |
| <b>Figure S17.</b> Thermal ellipsoid drawing of [Fe(1-MeIm) <sub>2</sub> (TMP)].                                     | S10   |
| <b>Figure S18.</b> IR spectrum of the reaction product of [Fe(STIPS)(TMP)] and NO (g).                               | S11   |
| <b>Figure S19.</b> NMR spectrum of the reaction of [FeF(TMP)] with Me <sub>3</sub> SiSSiMe <sub>3</sub> .            | S11   |
| <b>Table S1.</b> Crystallographic data and refinement parameters.                                                    | S12   |

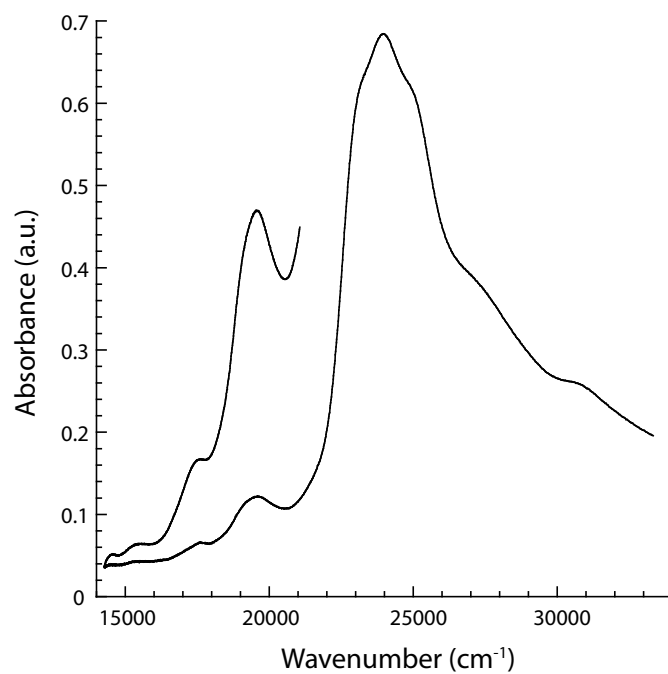

**Figure S1.** Electronic absorption spectrum of [Fe(STIPS)(TPP)] in dichloromethane.

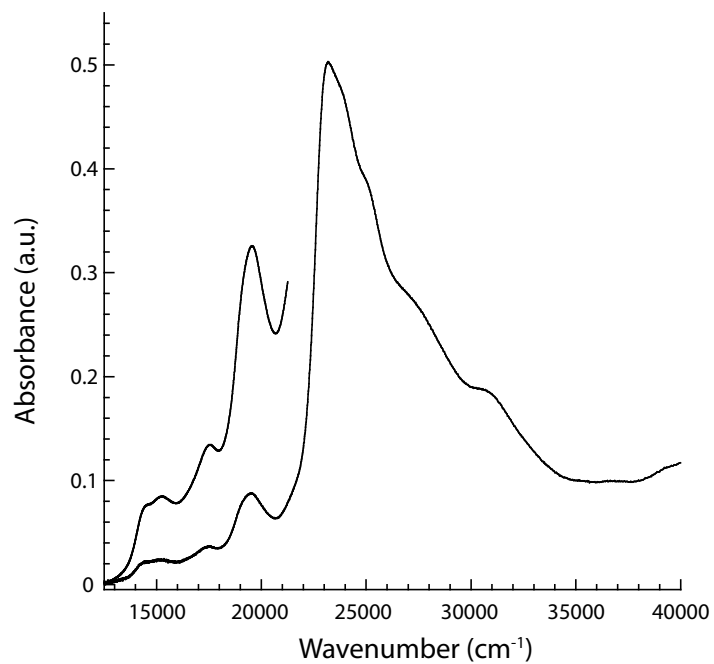

**Figure S2.** Electronic absorption spectrum of [Fe(STIPS)(TMP)] in dichloromethane.

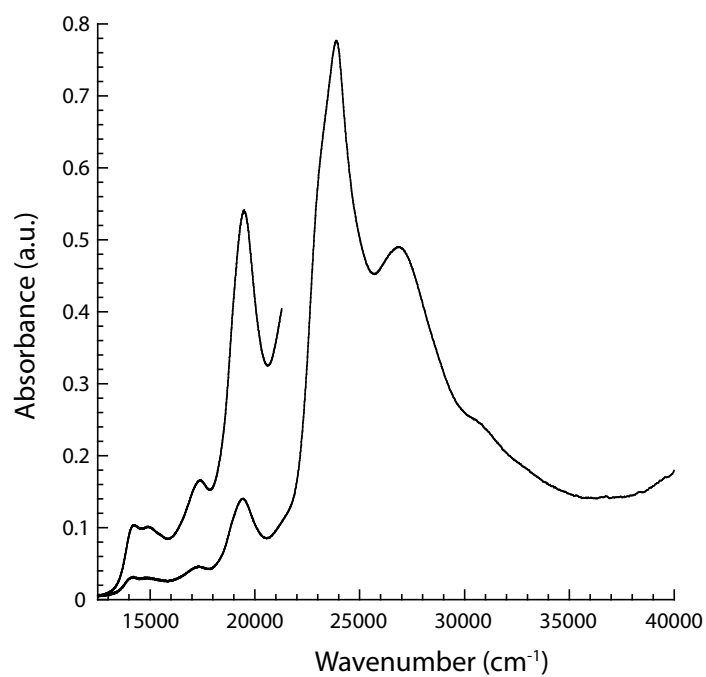

**Figure S3.** Electronic absorption spectrum of [Fe(SSiPh<sub>3</sub>)(TMP)] in dichloromethane.

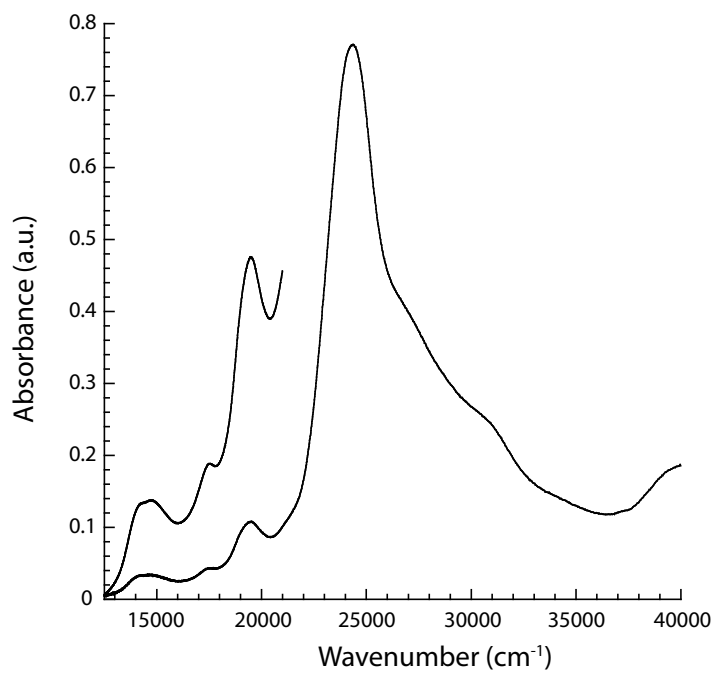

**Figure S4.** Electronic spectrum of [Fe(SPh)(TMP)] in dichloromethane.

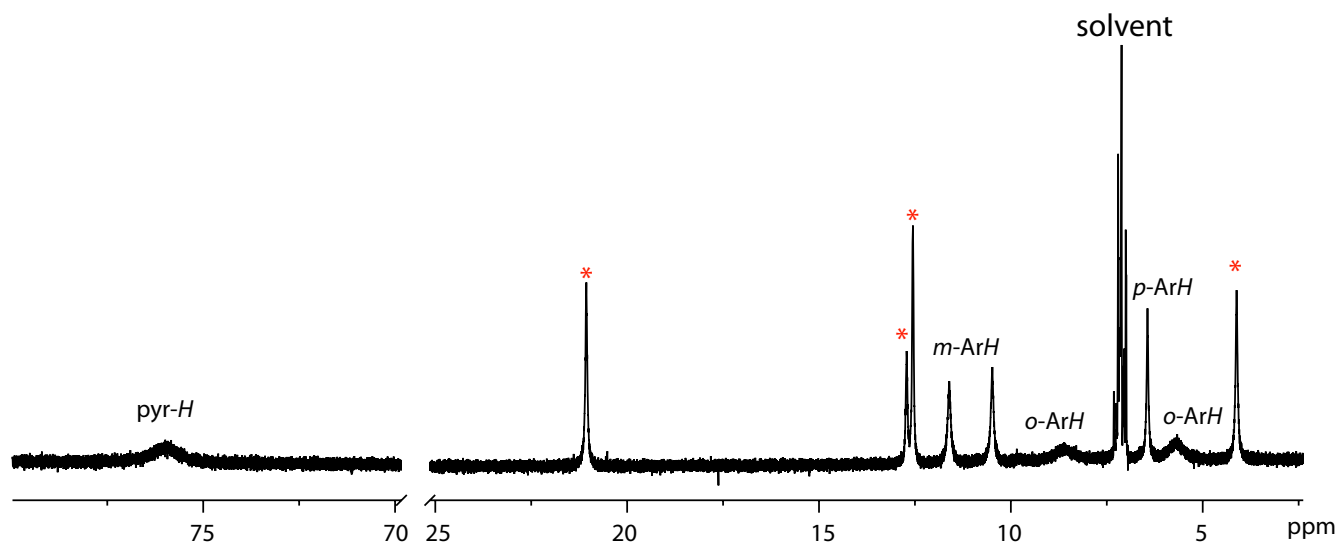

**Figure S5.** 500 MHz  $^1\text{H}$  NMR spectrum of the reaction of  $[\text{Fe}(\text{OMe})(\text{TPP})]$  and  $t\text{BuSH}$  in benzene- $d_6$ . Red asterisks denote peaks due to  $[\text{Fe}^{\text{II}}(\text{TPP})]$ .

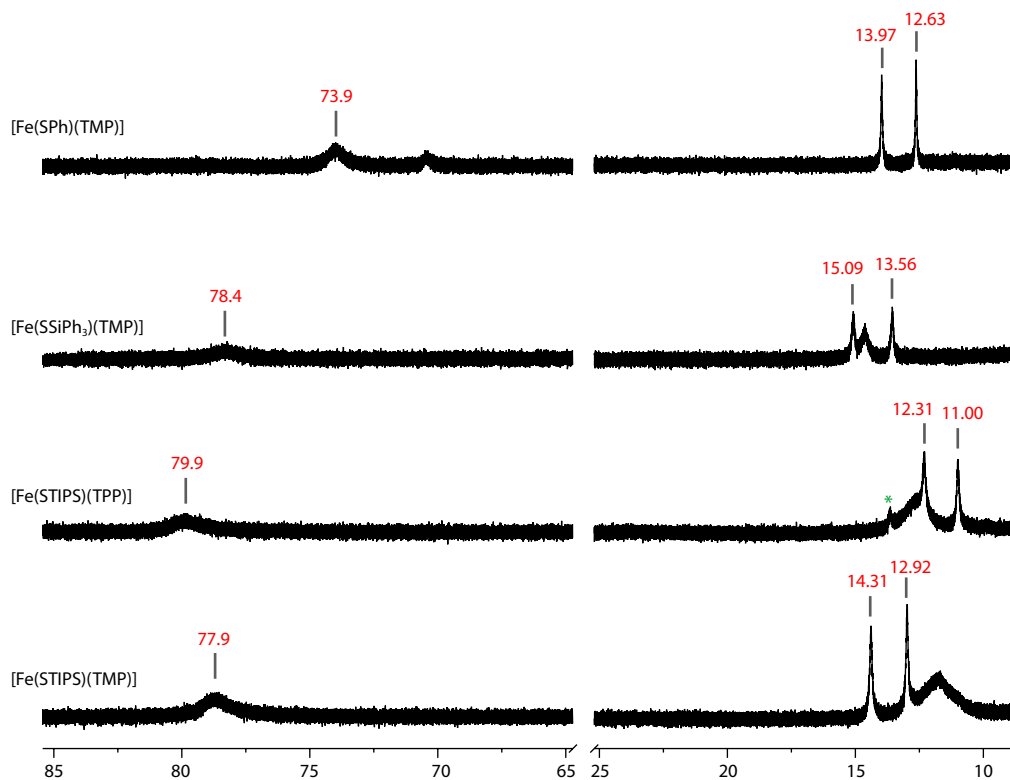

**Figure S6.** Pyrrolic and  $m\text{-Ar}$  region of the 500 MHz  $^1\text{H}$  NMR spectra (benzene- $d_6$ ) for several iron(III) porphyrinates containing sulfur ligands. The green asterisk in the spectrum of  $[\text{Fe}(\text{STIPS})(\text{TPP})]$  corresponds to a minor impurity, most likely  $[\text{Fe}^{\text{II}}(\text{TPP})]$ .

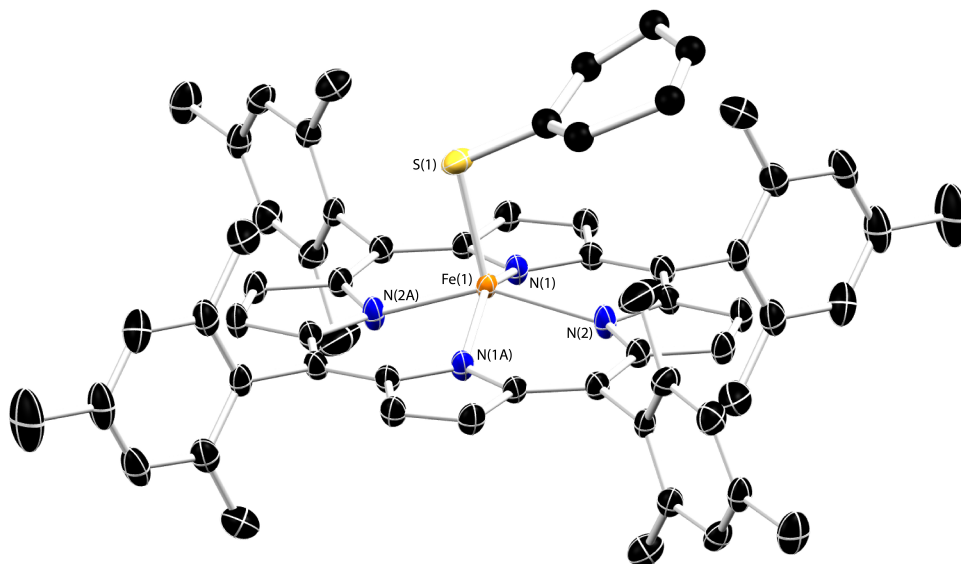

**Figure S7.** Depiction of the solid-state structure of [Fe(SPh)(TMP)] showing the geometry and connectivity of the atoms.

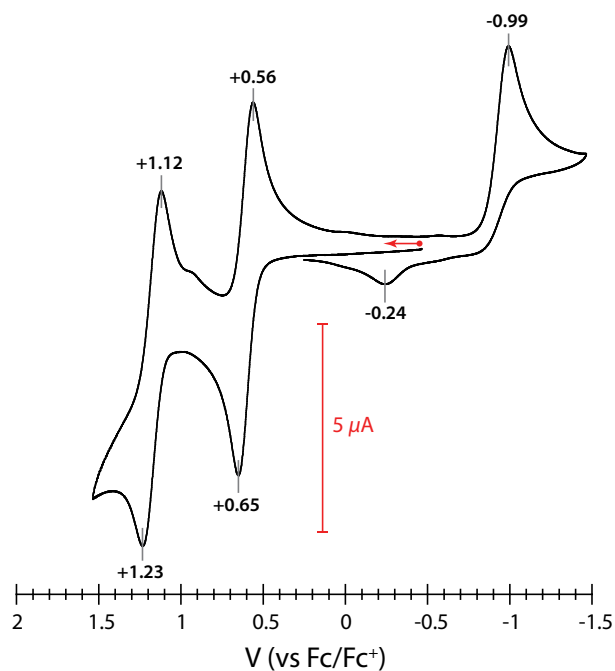

**Figure S8.** Cyclic voltammogram of [FeCl(TMP)] at a Pt disk electrode in  $\text{CH}_2\text{Cl}_2$  displaying two reversible oxidation events centered at +1.18 V and +0.61 V, and an irreversible reduction event at  $-0.99$  V. The small event at  $-0.24$  V observed in the return wave is likely due to oxidation of a species formed by chloride dissociation from [FeCl(TMP)]<sup>-</sup>. Scan rate is 50 mV/s and the supporting electrolyte is 0.1 M  $\text{Bu}_4\text{NPF}_6$ .

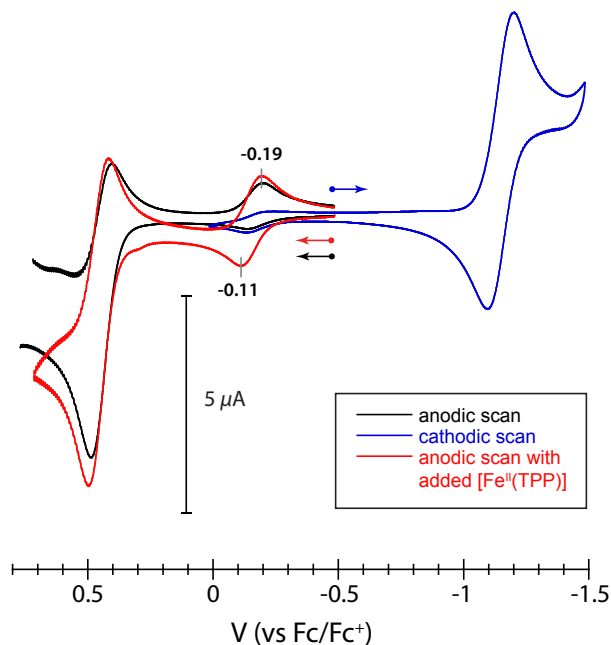

**Figure S9.** Cyclic voltammogram of [Fe(STIPS)(TPP)] at a Pt disk electrode in  $\text{CH}_2\text{Cl}_2$ . Depicted are the anodic and cathodic scans comprising Figure 4 of the text and the effect of added  $[\text{Fe}^{\text{II}}(\text{TPP})]$ . Scan rate is 50 mV/s and the supporting electrolyte is 0.1 M  $\text{Bu}_4\text{NPF}_6$ .

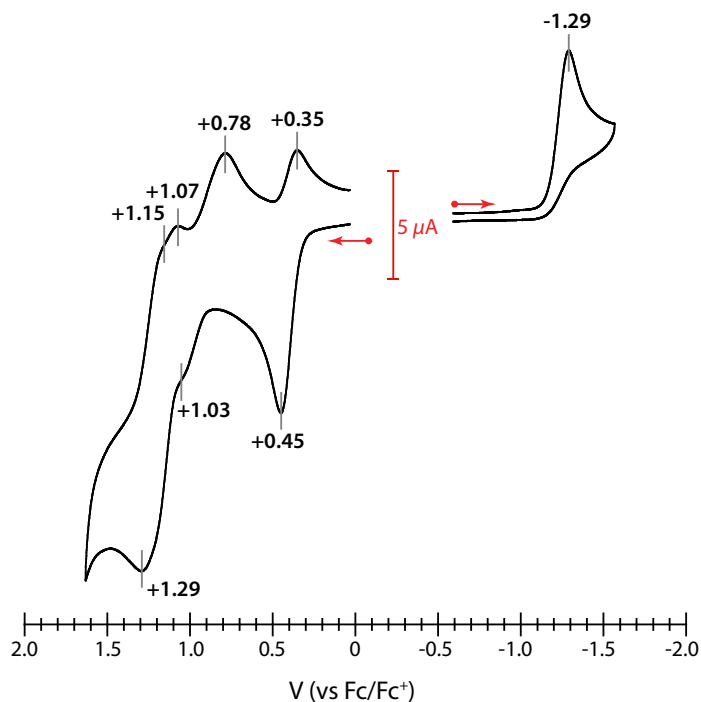

**Figure S10.** Cyclic voltammogram of [Fe(STIPS)(TMP)] at a Pt disk electrode in  $\text{CH}_2\text{Cl}_2$ . Scan rate is 50 mV/s and the supporting electrolyte is 0.1 M  $\text{Bu}_4\text{NPF}_6$ .

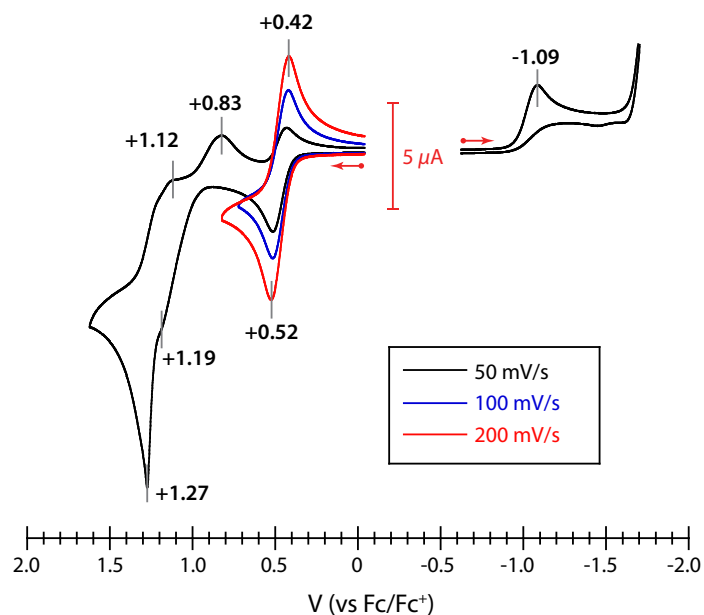

**Figure S11.** Cyclic voltammogram of  $[\text{Fe}(\text{SSiPh}_3)(\text{TMP})]$  at a Pt disk electrode in  $\text{CH}_2\text{Cl}_2$ . Scan rate is  $50 \text{ mV/s}$  and the supporting electrolyte is  $0.1 \text{ M Bu}_4\text{NPF}_6$ .

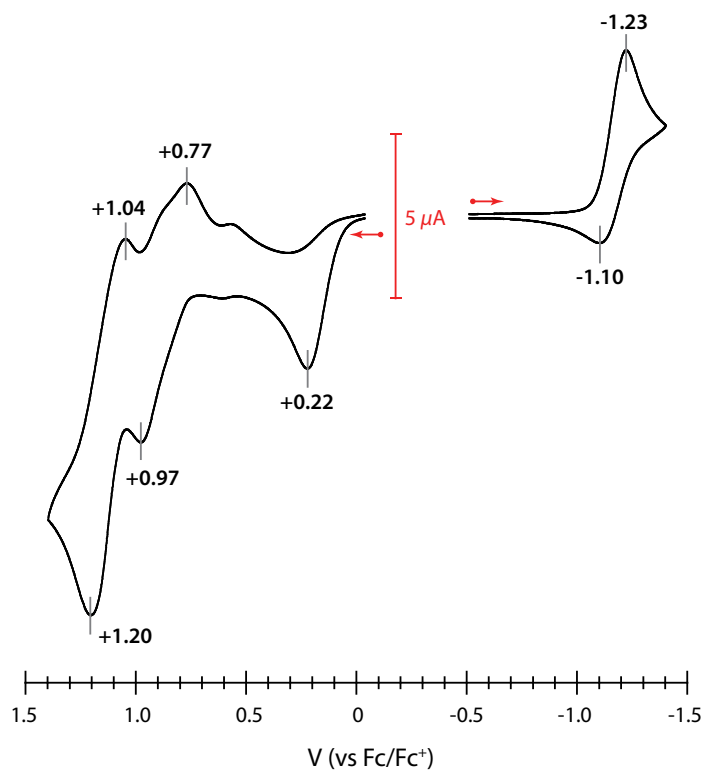

**Figure S12.** Cyclic voltammogram of  $[\text{Fe}(\text{SPh})(\text{TMP})]$  at a Pt disk electrode in  $\text{CH}_2\text{Cl}_2$ . Scan rate is  $50 \text{ mV/s}$  and the supporting electrolyte is  $0.1 \text{ M Bu}_4\text{NPF}_6$ .

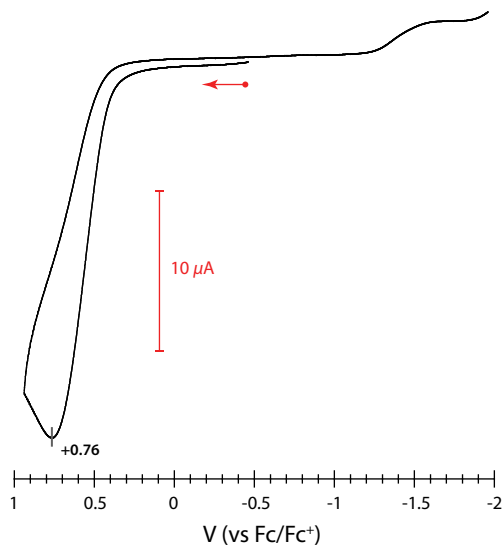

**Figure S13.** Cyclic voltammogram of  $\text{HSSiPr}_3$  at a Pt disk electrode in  $\text{CH}_2\text{Cl}_2$  in the presence of excess  $\text{Et}_3\text{N}$  displaying the oxidation of free  $\text{SSiPr}_3^-$ . Scan rate is  $50 \text{ mV/s}$  and the supporting electrolyte is  $0.1 \text{ M Bu}_4\text{NPF}_6$ . The potentials are referenced to an external ferrocene/ferrocenium couple.

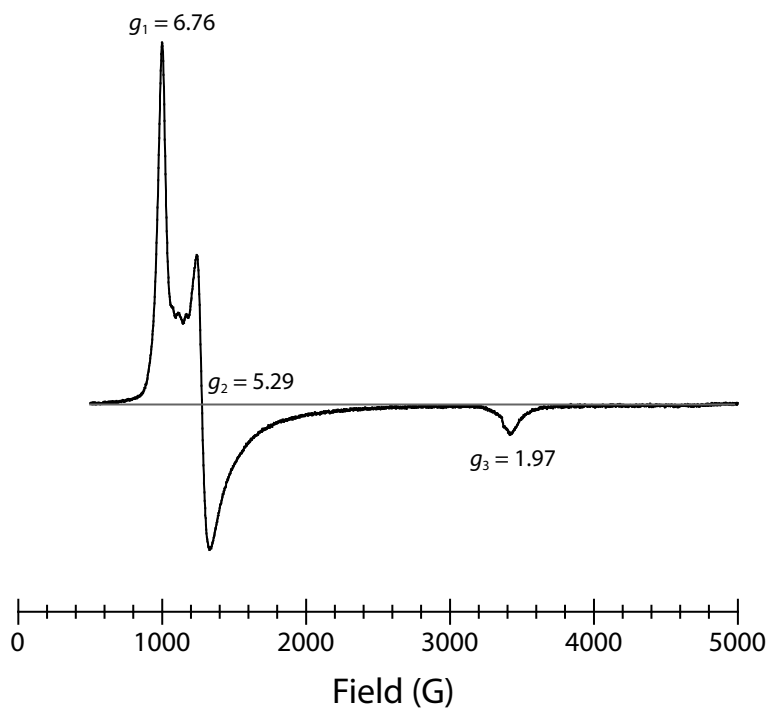

**Figure S14.** EPR spectrum of  $[\text{Fe}(\text{STIPS})(\text{TMP})]$  in a 2-MeTHF glass at  $77 \text{ K}$ ;  $E/D = 0.0323$ .



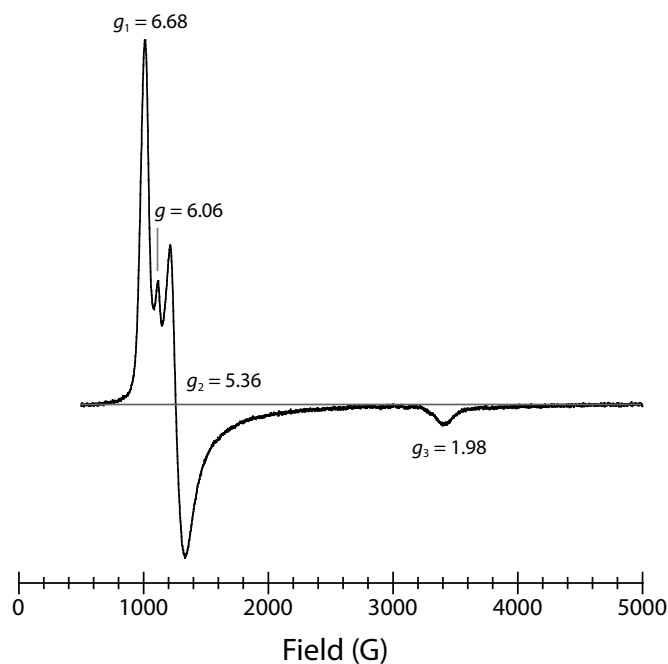

**Figure S15.** EPR spectrum of  $[\text{Fe}(\text{SSiPh}_3)(\text{TMP})]$  in a 2-MeTHF glass at 77 K;  $E/D = 0.0297$ .

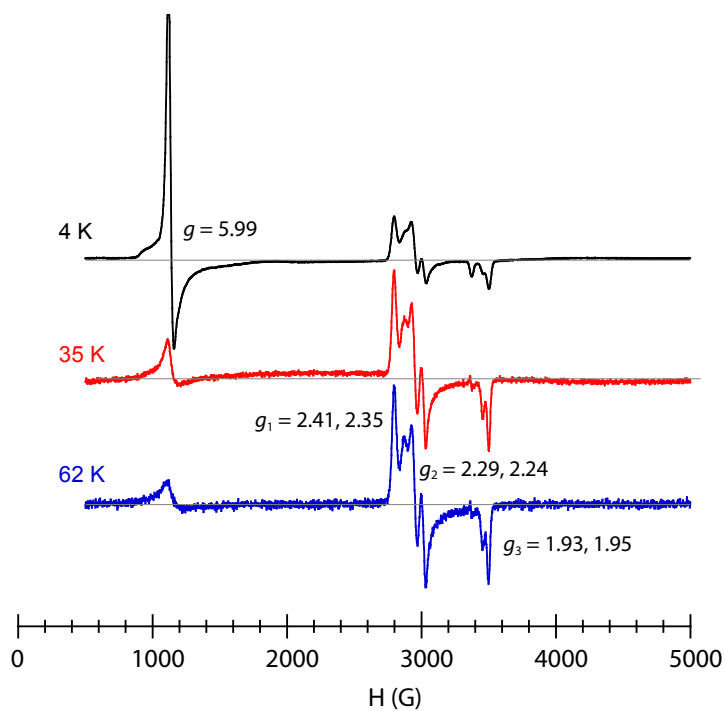

**Figure S16.** EPR spectra of  $[\text{Fe}(\text{SPh})(\text{TMP})]$  in a 2-MeTHF glass at several temperatures between 4 and 62 K showing a decrease in the low field  $S = 5/2$  signal ( $E/D = 0.0026$ ) and growth of the high field signals ( $S = 1/2$ ) as the temperature increases.

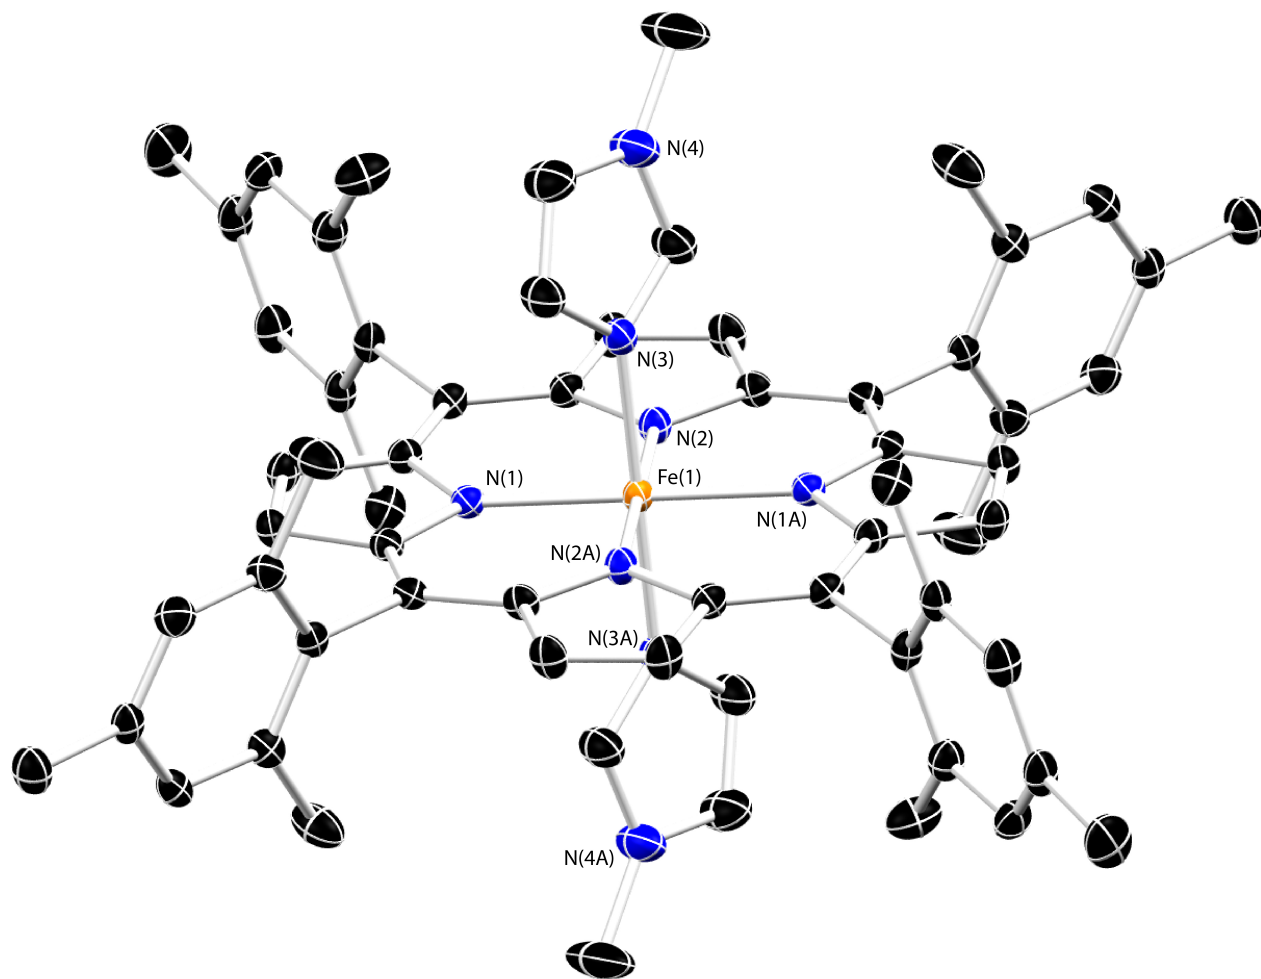

**Figure S17.** Thermal ellipsoid (50%) drawing of the structure of  $[\text{Fe}(\text{1-MeIm})_2(\text{TMP})]$ . Hydrogen atoms and cocrystallized benzene molecules omitted for clarity. Selected bond lengths ( $\text{\AA}$ ) and angles (deg):  $\text{Fe}(1)\text{-N}(1) = 1.990(2)$ ;  $\text{Fe}(1)\text{-N}(2) = 1.991(2)$ ;  $\text{Fe}(1)\text{-N}(3) = 1.992(2)$ ;  $\text{N}(3)\text{-Fe}(1)\text{-N}(3\text{A}) = 180.0(2)$ .

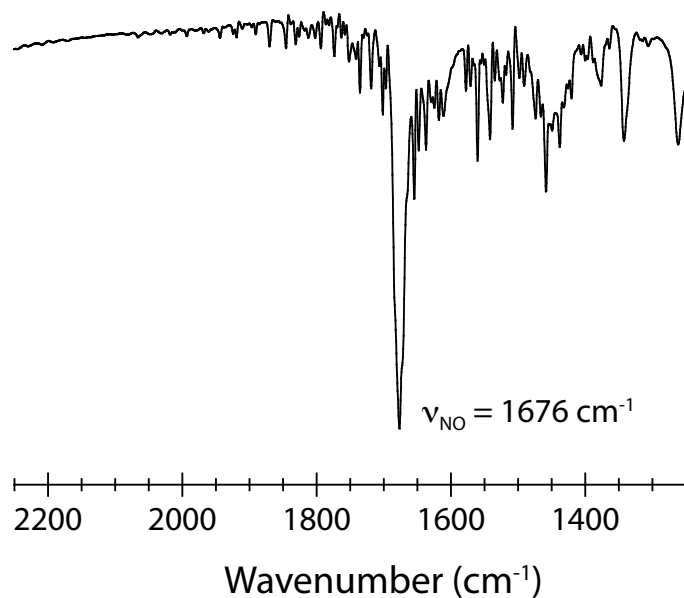

**Figure S18.** IR (KBr) spectrum of the product obtained from the reaction of [Fe(STIPS)(TMP)] and NO (g).

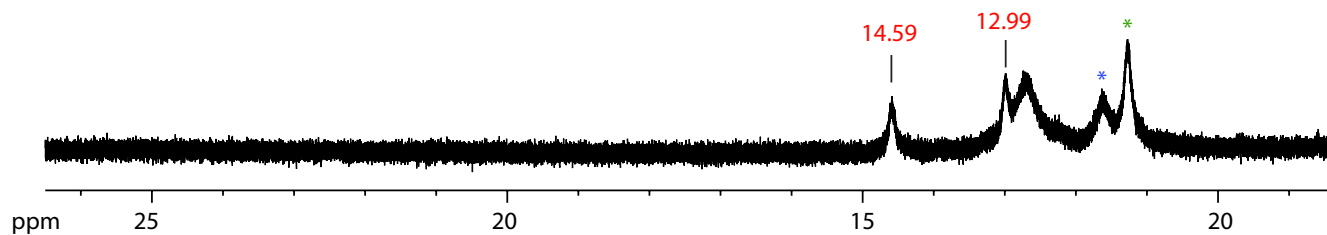

**Figure S19.** *m*-Ar region of the 500 MHz <sup>1</sup>H NMR spectrum of the reaction of [FeF(TMP)] with Me<sub>3</sub>SSiMe<sub>3</sub> in benzene-*d*<sub>6</sub>. Note the resemblance of the peaks indicated in red with those in Figure S6. Asterisks denote resonances due to the starting material (blue) and [Fe<sup>II</sup>(TMP)] (green).

**Table S1.** Crystallographic data and refinement parameters for iron porphyrinates.<sup>‡</sup>

| Compound                                            | [Fe(STIPS)(TPP)]                                                                                                          | [Fe(STIPS)(TMP)]                                                                                                             | [Fe(SSiPh <sub>3</sub> )(TMP)]                                                       | [Fe(1-Melm) <sub>2</sub> (TMP)]                                                     |
|-----------------------------------------------------|---------------------------------------------------------------------------------------------------------------------------|------------------------------------------------------------------------------------------------------------------------------|--------------------------------------------------------------------------------------|-------------------------------------------------------------------------------------|
| Empirical formula                                   | C <sub>53</sub> H <sub>49</sub> FeN <sub>4</sub> SSi·½C <sub>6</sub> H <sub>6</sub>                                       | C <sub>65</sub> H <sub>73</sub> FeN <sub>4</sub> SSi·C <sub>5</sub> H <sub>12</sub>                                          | C <sub>74</sub> H <sub>67</sub> FeN <sub>4</sub> SSi·CH <sub>2</sub> Cl <sub>2</sub> | C <sub>64</sub> H <sub>64</sub> FeN <sub>8</sub> ·2(C <sub>6</sub> H <sub>6</sub> ) |
| Formula weight (g/mol)                              | 897.02                                                                                                                    | 1098.42                                                                                                                      | 1196.26                                                                              | 1229.36                                                                             |
| Temperature (K)                                     | 98(2)                                                                                                                     | 98(2)                                                                                                                        | 98(2)                                                                                | 98(2)                                                                               |
| Crystal system,<br>space group                      | Triclinic,<br><i>P</i> $\bar{1}$                                                                                          | Triclinic,<br><i>P</i> $\bar{1}$                                                                                             | Monoclinic,<br><i>P</i> 2 <sub>1</sub> / <i>n</i>                                    | Orthorhombic,<br><i>Pcca</i>                                                        |
| Unit cell dimensions<br>(Å, deg)                    | a = 11.113(3)<br>b = 12.600(3)<br>c = 16.927(4)<br>$\alpha$ = 80.693(11)<br>$\beta$ = 85.049(12)<br>$\gamma$ = 77.332(11) | a = 13.4086(5)<br>b = 14.4072(7)<br>c = 17.3566(12)<br>$\alpha$ = 110.724(8)<br>$\beta$ = 102.571(7)<br>$\gamma$ = 95.034(7) | a = 16.4254(13)<br>b = 18.9508(14)<br>c = 22.8901(19)<br>$\beta$ = 108.668(8)        | a = 23.0929(16)<br>b = 14.8314(10)<br>c = 19.2077(11)                               |
| Volume (Å <sup>3</sup> )                            | 2278.9(10)                                                                                                                | 3010.6(3)                                                                                                                    | 6750.2(9)                                                                            | 6578.6(7)                                                                           |
| Z                                                   | 2                                                                                                                         | 2                                                                                                                            | 4                                                                                    | 4                                                                                   |
| Calculated density<br>(g/cm <sup>3</sup> )          | 1.307                                                                                                                     | 1.155                                                                                                                        | 1.177                                                                                | 1.241                                                                               |
| Absorption coefficient<br>(mm <sup>-1</sup> )       | 0.446                                                                                                                     | 0.347                                                                                                                        | 0.379                                                                                | 0.282                                                                               |
| F(000)                                              | 944                                                                                                                       | 1117                                                                                                                         | 2514                                                                                 | 2600                                                                                |
| Crystal size (mm)                                   | 0.14 × 0.12 × 0.10                                                                                                        | 0.36 × 0.35 × 0.06                                                                                                           | 0.20 × 0.07 × 0.05                                                                   | 0.19 × 0.09 × 0.07                                                                  |
| Θ range                                             | 2.2 to 26.0°                                                                                                              | 3.1 to 25.1°                                                                                                                 | 3.0 to 23.1°                                                                         | 3.1 to 25.1°                                                                        |
| Limiting indices                                    | -13 ≤ h ≤ 13,<br>-14 ≤ k ≤ 15,<br>-20 ≤ l ≤ 20                                                                            | -15 ≤ h ≤ 15,<br>-17 ≤ k ≤ 16,<br>-18 ≤ l ≤ 20                                                                               | -18 ≤ h ≤ 17,<br>0 ≤ k ≤ 20,<br>0 ≤ l ≤ 25,                                          | -27 ≤ h ≤ 26,<br>-13 ≤ k ≤ 17,<br>-22 ≤ l ≤ 22                                      |
| Reflections collected /<br>unique                   | 13515 / 8871<br>[R <sub>int</sub> = 0.0435]                                                                               | 17753 / 10578<br>[R <sub>int</sub> = 0.0263]                                                                                 | 9440 / 9440                                                                          | 33972 / 5821<br>[R <sub>int</sub> = 0.0556]                                         |
| Completeness to Θ                                   | 99.1%                                                                                                                     | 99.3%                                                                                                                        | 99.3%                                                                                | 99.8%                                                                               |
| Absorption correction                               | multi-scan ABSCOR                                                                                                         | multi-scan ABSCOR                                                                                                            | multi-scan ABSCOR                                                                    | multi-scan ABSCOR                                                                   |
| Min. and max<br>transmission                        | 0.777 and 1.000                                                                                                           | 0.467 and 1.000                                                                                                              | 0.362 and 1.000                                                                      | 0.751 and 1.000                                                                     |
| Data / restraints /<br>parameters                   | 8871 / 2 / 568                                                                                                            | 10578 / 0 / 676                                                                                                              | 9440 / 0 / 757                                                                       | 5821 / 0 / 412                                                                      |
| Goodness-of-fit on F <sup>2</sup>                   | 1.008                                                                                                                     | 1.018                                                                                                                        | 1.034                                                                                | 1.029                                                                               |
| Final R indices<br>[I > 2σ(I)]                      | R <sub>1</sub> = 0.0587,<br>wR <sub>2</sub> = 0.1288                                                                      | R <sub>1</sub> = 0.0561,<br>wR <sub>2</sub> = 0.1447                                                                         | R <sub>1</sub> = 0.0900,<br>wR <sub>2</sub> = 0.1813                                 | R <sub>1</sub> = 0.0517,<br>wR <sub>2</sub> = 0.1251                                |
| R indices (all data)                                | R <sub>1</sub> = 0.0687,<br>wR <sub>2</sub> = 0.1358                                                                      | R <sub>1</sub> = 0.0603,<br>wR <sub>2</sub> = 0.1471                                                                         | R <sub>1</sub> = 0.1424,<br>wR <sub>2</sub> = 0.1982                                 | R <sub>1</sub> = 0.0697,<br>wR <sub>2</sub> = 0.1349                                |
| Largest diff. peak and<br>hole (e·Å <sup>-3</sup> ) | 0.604 and -0.627                                                                                                          | 0.998 and -0.464                                                                                                             | 1.167 and -0.818                                                                     | 0.534 and -0.422                                                                    |

<sup>‡</sup>Refinement method was full-matrix least-squares on F<sup>2</sup>; wavelength = 0.71073 Å. R<sub>1</sub> =  $\sum||F_o| - |F_c|| / \sum|F_o|$ ; wR<sub>2</sub> =  $\{\sum[w(F_o^2 - F_c^2)^2] / \sum[w(F_o^2)^2]\}^{1/2}$ .
